# Supplementary material
Source: PubMed Central journal article supplement (PMC9578147)
Supplement: NIHMS1840689-supplement-Supplemental_Figs_Tables.pdf [file NIHMS1840689-supplement-Supplemental_Figs_Tables.pdf]

**Supplemental Figure 1.** Trend in high out-of-pocket cost burden rate\* by employer size, 2001-2017

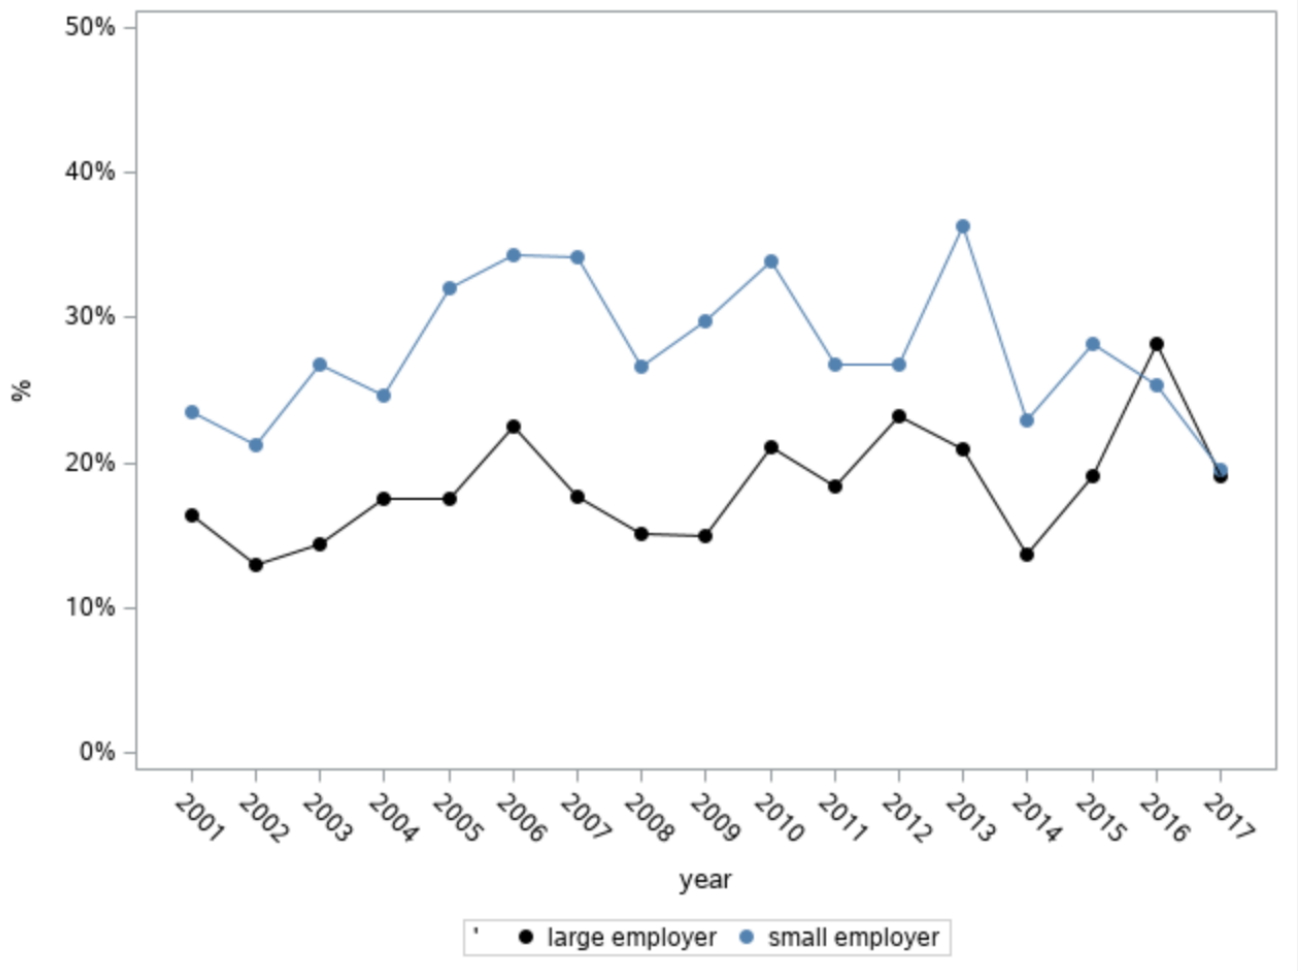

\*High out-of-pocket (OOP) cost rate: percentage of patients living in a family with OOP costs exceeding 10% of family income.

**Supplemental Figure 2.** Trends in high out-of-pocket cost burden rate\* by health plan type (traditional plan versus high deductible health plan (HDHP)) among those with private insurance, 2011-2017

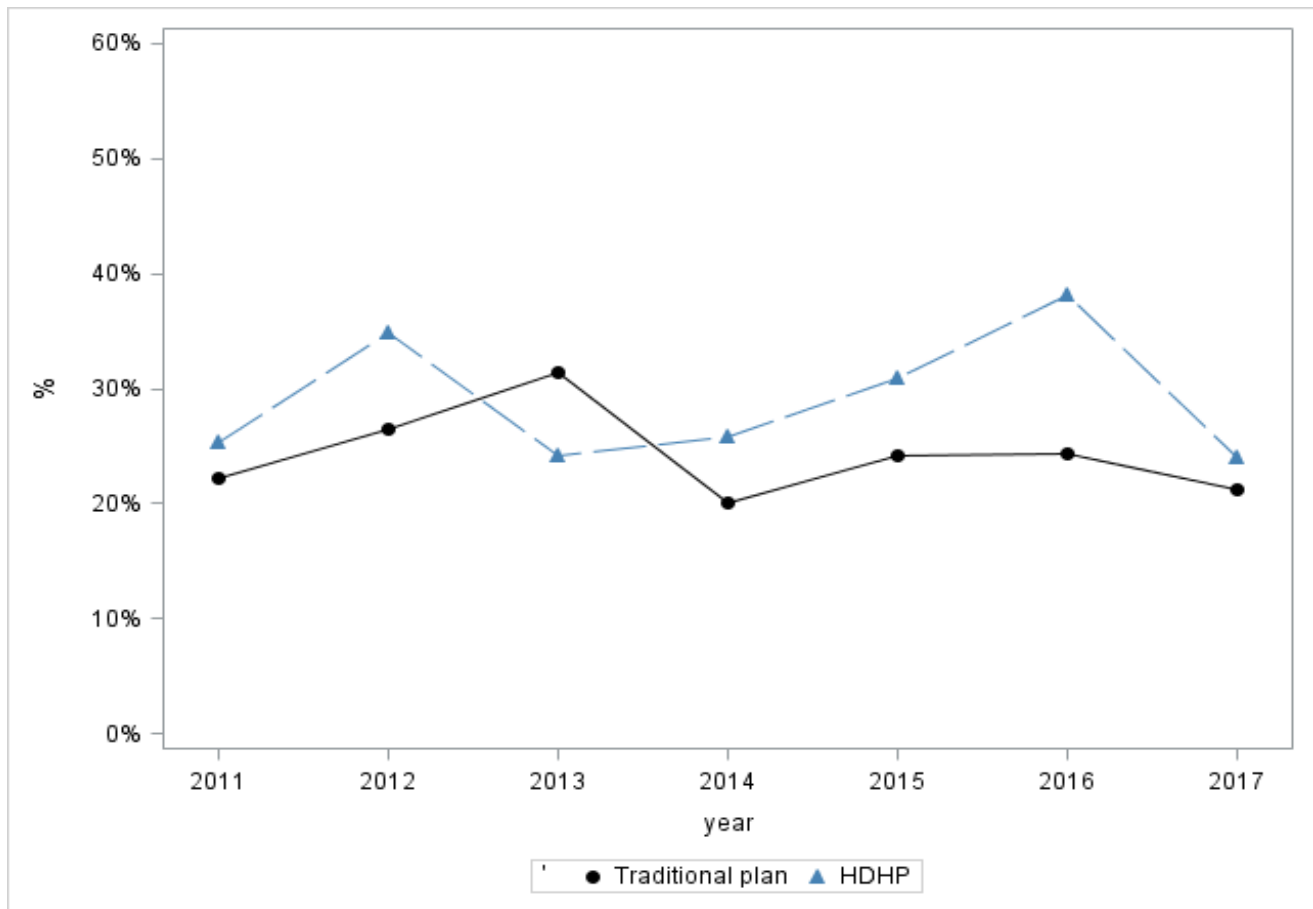

\*High out-of-pocket (OOP) cost rate: percentage of patients living in a family with OOP costs exceeding 10% of family income.

**Supplemental Figure 3.** Trend in high out-of-pocket cost burden rate\* by insulin use, 2001-2017

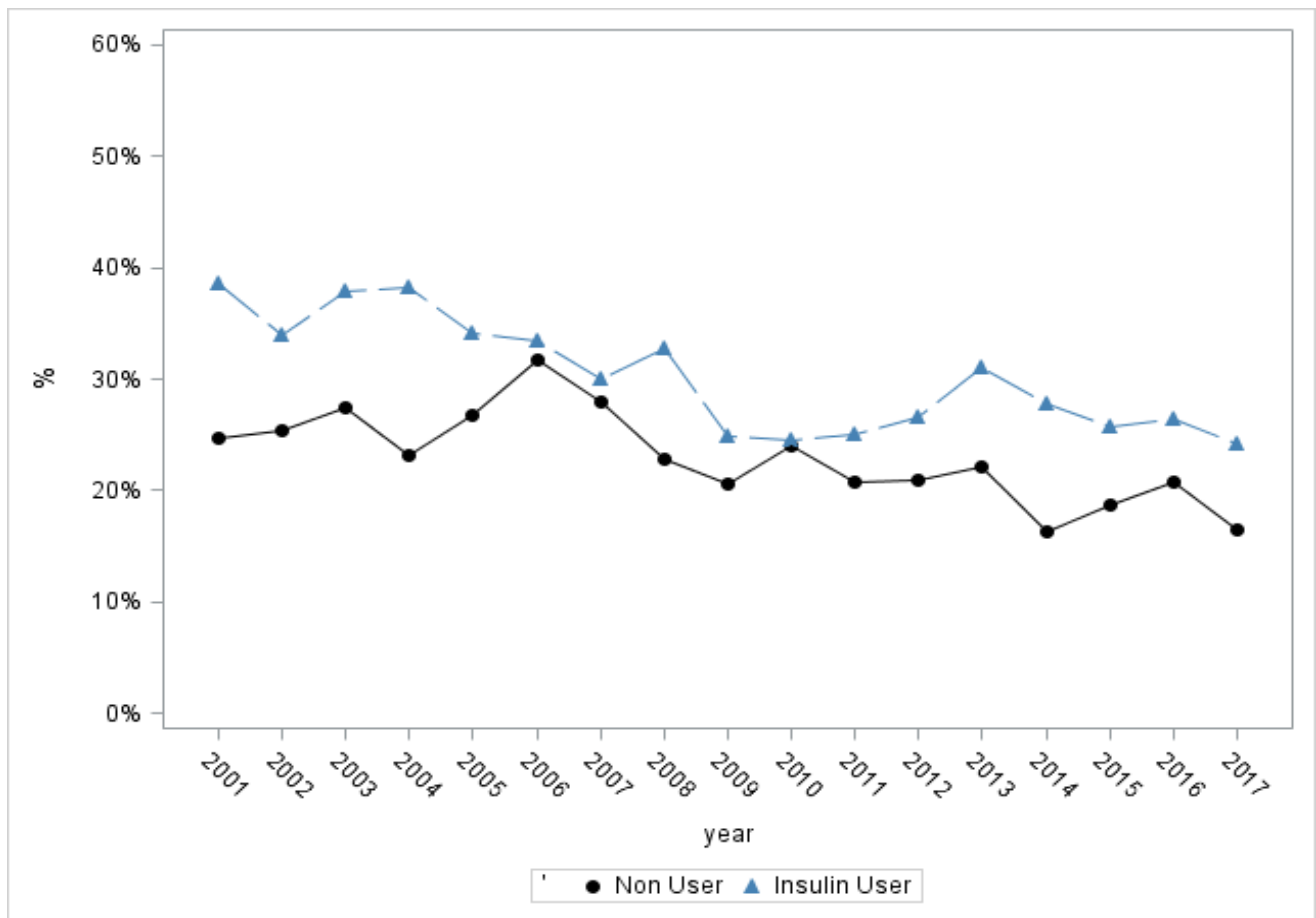

\*High out-of-pocket (OOP) cost rate: percentage of patients living in a family with OOP costs exceeding 10% of family income.

**Supplemental Table 1.** Mean Annual Family Out-of-pocket (OOP) Expenditures by Insurance Type among People with Diabetes

|                          | Sample Size | Annual family income | Annual OOP family premium <sup>‡</sup> | Annual family OOP cost <sup>*</sup> |                    |                |                 |            | Individual OOP cost of people with diabetes <sup>†</sup> |
|--------------------------|-------------|----------------------|----------------------------------------|-------------------------------------|--------------------|----------------|-----------------|------------|----------------------------------------------------------|
|                          |             |                      |                                        | All health care service             | Prescription drugs | Inpatient care | Outpatient care | Other care |                                                          |
|                          | n           | Mean, \$             | Mean, \$                               | Mean (SD), \$                       |                    |                |                 |            |                                                          |
| <b>Overall</b>           |             |                      |                                        |                                     |                    |                |                 |            |                                                          |
| 2001                     | 959         | 70133                | 1504                                   | 2783(134)                           | 1610(95)           | 124(22)        | 491(38)         | 558(51)    | 1754(88)                                                 |
| 2002                     | 1165        | 73171                | 1480                                   | 2713(109)                           | 1531(80)           | 101(26)        | 551(38)         | 530(53)    | 1790(89)                                                 |
| 2003                     | 1007        | 68205                | 1821                                   | 2948(114)                           | 1851(81)           | 76(18)         | 483(43)         | 539(48)    | 1935(81)                                                 |
| 2004                     | 1107        | 68866                | 1903                                   | 2740(114)                           | 1650(95)           | 92(33)         | 434(28)         | 564(50)    | 1716(78)                                                 |
| 2005                     | 1165        | 65261                | 1746                                   | 2577(105)                           | 1555(72)           | 86(22)         | 477(34)         | 459(46)    | 1617(82)                                                 |
| 2006                     | 1301        | 67822                | 1822                                   | 2942(136)                           | 1679(76)           | 173(58)        | 562(42)         | 528(43)    | 1863(91)                                                 |
| 2007                     | 1202        | 69732                | 1848                                   | 2658(126)                           | 1300(55)           | 96(22)         | 543(45)         | 719(66)    | 1589(72)                                                 |
| 2008                     | 1431        | 68034                | 1794                                   | 2432(120)                           | 1173(73)           | 109(19)        | 607(55)         | 543(47)    | 1556(92)                                                 |
| 2009                     | 1429        | 65980                | 1809                                   | 2022(97)                            | 918(65)            | 133(27)        | 483(34)         | 488(45)    | 1297(81)                                                 |
| 2010                     | 1345        | 66134                | 2075                                   | 1866(74)                            | 930(44)            | 98(19)         | 429(26)         | 409(33)    | 1227(54)                                                 |
| 2011                     | 1488        | 66452                | 1962                                   | 1950(83)                            | 996(45)            | 106(35)        | 447(30)         | 400(38)    | 1301(67)                                                 |
| 2012                     | 1551        | 65294                | 2035                                   | 2024(108)                           | 978(66)            | 130(24)        | 436(31)         | 480(43)    | 1261(82)                                                 |
| 2013                     | 1557        | 67019                | 2192                                   | 2046(111)                           | 875(53)            | 125(49)        | 532(42)         | 514(44)    | 1318(90)                                                 |
| 2014                     | 1489        | 64309                | 1911                                   | 1656(74)                            | 670(38)            | 100(20)        | 483(31)         | 403(34)    | 1029(53)                                                 |
| 2015                     | 1519        | 65350                | 2003                                   | 1768(84)                            | 772(44)            | 87(20)         | 463(37)         | 446(37)    | 1082(53)                                                 |
| 2016                     | 1535        | 70202                | 2449                                   | 1792(95)                            | 780(70)            | 46(8)          | 502(34)         | 464(41)    | 1105(73)                                                 |
| 2017                     | 1444        | 71628                | 2228                                   | 1887(126)                           | 717(65)            | 107(25)        | 496(38)         | 568(69)    | 1110(71)                                                 |
| <b>Privately insured</b> |             |                      |                                        |                                     |                    |                |                 |            |                                                          |
| 2001                     | 566         | 85492                | 2062                                   | 2521(123)                           | 1291(73)           | 85(18)         | 539(47)         | 606(66)    | 1451(87)                                                 |
| 2002                     | 634         | 94033                | 2018                                   | 2585(96)                            | 1290(58)           | 70(15)         | 619(46)         | 605(73)    | 1563(81)                                                 |
| 2003                     | 501         | 84825                | 2525                                   | 2852(141)                           | 1521(78)           | 75(23)         | 595(61)         | 660(67)    | 1753(96)                                                 |
| 2004                     | 564         | 87996                | 2788                                   | 2903(146)                           | 1594(122)          | 73(18)         | 525(31)         | 711(70)    | 1671(87)                                                 |
| 2005                     | 564         | 82748                | 2585                                   | 2822(140)                           | 1571(99)           | 87(26)         | 590(45)         | 574(67)    | 1720(119)                                                |
| 2006                     | 646         | 85716                | 2711                                   | 3238(190)                           | 1640(95)           | 225(93)        | 710(63)         | 664(66)    | 1927(127)                                                |
| 2007                     | 647         | 86602                | 2617                                   | 2839(169)                           | 1294(70)           | 83(15)         | 644(58)         | 818(96)    | 1649(96)                                                 |
| 2008                     | 774         | 86250                | 2717                                   | 2544(156)                           | 1085(84)           | 103(22)        | 760(80)         | 596(57)    | 1535(114)                                                |
| 2009                     | 707         | 84781                | 2833                                   | 2275(106)                           | 980(48)            | 117(27)        | 585(43)         | 593(66)    | 1323(73)                                                 |
| 2010                     | 646         | 85932                | 3298                                   | 2205(98)                            | 1010(47)           | 89(18)         | 559(37)         | 547(53)    | 1369(70)                                                 |
| 2011                     | 710         | 86804                | 3039                                   | 2164(100)                           | 1049(55)           | 74(17)         | 564(45)         | 477(43)    | 1376(70)                                                 |
| 2012                     | 707         | 87068                | 3343                                   | 2424(155)                           | 1131(102)          | 171(40)        | 567(41)         | 554(54)    | 1454(133)                                                |
| 2013                     | 698         | 86092                | 3527                                   | 2431(150)                           | 1001(72)           | 94(24)         | 711(64)         | 626(75)    | 1471(103)                                                |
| 2014                     | 665         | 88119                | 3112                                   | 2027(101)                           | 786(51)            | 96(22)         | 605(42)         | 540(52)    | 1199(72)                                                 |
| 2015                     | 670         | 86795                | 3245                                   | 2321(135)                           | 943(72)            | 124(38)        | 653(60)         | 600(61)    | 1351(83)                                                 |
| 2016                     | 688         | 90359                | 3835                                   | 2305(138)                           | 949(99)            | 54(13)         | 686(54)         | 615(66)    | 1406(111)                                                |
| 2017                     | 660         | 98330                | 3555                                   | 2400(184)                           | 804(80)            | 146(42)        | 687(53)         | 763(116)   | 1415(106)                                                |
| <b>Publicly insured</b>  |             |                      |                                        |                                     |                    |                |                 |            |                                                          |
| 2001                     | 247         | 38981                | 604                                    | 3325(294)                           | 2343(203)          | 128(48)        | 328(50)         | 527(104)   | 2306(171)                                                |
| 2002                     | 351         | 36130                | 660                                    | 2815(276)                           | 1935(230)          | 128(16)        | 347(67)         | 404(73)    | 2097(212)                                                |
| 2003                     | 361         | 36949                | 828                                    | 3005(207)                           | 2427(200)          | 63(28)         | 212(31)         | 302(70)    | 2190(141)                                                |
| 2004                     | 381         | 35535                | 438                                    | 2189(163)                           | 1656(136)          | 33(13)         | 197(27)         | 302(45)    | 1554(134)                                                |
| 2005                     | 418         | 37250                | 517                                    | 2084(133)                           | 1506(90)           | 78(48)         | 206(34)         | 293(62)    | 1376(96)                                                 |

|                  |     |       |     |           |           |          |          |          |           |
|------------------|-----|-------|-----|-----------|-----------|----------|----------|----------|-----------|
| <b>2006</b>      | 441 | 39460 | 470 | 2199(132) | 1542(102) | 80(22)   | 266(26)  | 311(44)  | 1558(93)  |
| <b>2007</b>      | 363 | 36905 | 663 | 1983(175) | 1074(85)  | 106(72)  | 257(39)  | 546(76)  | 1308(110) |
| <b>2008</b>      | 402 | 34962 | 451 | 1934(208) | 1042(104) | 37(13)   | 323(62)  | 532(108) | 1272(156) |
| <b>2009</b>      | 448 | 35937 | 452 | 1552(254) | 809(217)  | 79(26)   | 347(79)  | 317(57)  | 1127(246) |
| <b>2010</b>      | 442 | 39715 | 521 | 1289(126) | 800(95)   | 44(15)   | 248(45)  | 198(31)  | 943(102)  |
| <b>2011</b>      | 481 | 36375 | 676 | 1557(142) | 925(92)   | 43(15)   | 281(48)  | 308(92)  | 1129(121) |
| <b>2012</b>      | 537 | 36159 | 495 | 1308(125) | 716(75)   | 81(19)   | 238(44)  | 274(44)  | 843(75)   |
| <b>2013</b>      | 575 | 40900 | 434 | 1436(209) | 628(97)   | 222(158) | 253(49)  | 333(57)  | 1065(204) |
| <b>2014</b>      | 603 | 32910 | 429 | 1080(103) | 440(50)   | 118(46)  | 319(55)  | 202(36)  | 724(82)   |
| <b>2015</b>      | 645 | 37081 | 510 | 1060(96)  | 532(58)   | 32(12)   | 236(41)  | 260(40)  | 717(68)   |
| <b>2016</b>      | 647 | 42423 | 562 | 916(96)   | 423(55)   | 33(9)    | 220(33)  | 240(37)  | 608(73)   |
| <b>2017</b>      | 646 | 37109 | 542 | 1179(117) | 566(85)   | 50(17)   | 249(33)  | 314(46)  | 667(69)   |
| <b>Uninsured</b> |     |       |     |           |           |          |          |          |           |
| <b>2001</b>      | 146 | 48493 | 242 | 3128(385) | 1881(267) | 335(136) | 561(102) | 350(74)  | 2314(316) |
| <b>2002</b>      | 180 | 41680 | 398 | 3162(277) | 1945(187) | 206(104) | 614(103) | 397(94)  | 2325(226) |
| <b>2003</b>      | 145 | 55544 | 443 | 3342(287) | 2212(240) | 112(21)  | 548(91)  | 471(80)  | 2298(195) |
| <b>2004</b>      | 162 | 39986 | 368 | 3172(366) | 1970(234) | 360(284) | 490(102) | 352(52)  | 2397(331) |
| <b>2005</b>      | 183 | 43626 | 414 | 2532(228) | 1595(127) | 99(43)   | 565(131) | 273(54)  | 1681(151) |
| <b>2006</b>      | 214 | 39917 | 300 | 3112(289) | 2197(237) | 118(27)  | 472(73)  | 325(42)  | 2234(180) |
| <b>2007</b>      | 192 | 51977 | 432 | 3097(350) | 1766(178) | 141(64)  | 611(164) | 579(115) | 1845(191) |
| <b>2008</b>      | 255 | 48332 | 193 | 2845(292) | 1791(240) | 267(106) | 455(122) | 332(64)  | 2166(275) |
| <b>2009</b>      | 274 | 45193 | 203 | 1853(232) | 865(120)  | 284(143) | 328(46)  | 376(77)  | 1487(201) |
| <b>2010</b>      | 257 | 41203 | 384 | 1679(187) | 875(112)  | 236(117) | 281(38)  | 287(55)  | 1230(172) |
| <b>2011</b>      | 297 | 49919 | 440 | 1937(249) | 943(101)  | 367(222) | 337(35)  | 290(53)  | 1372(237) |
| <b>2012</b>      | 307 | 46273 | 411 | 2089(191) | 976(146)  | 79(25)   | 375(63)  | 659(100) | 1460(160) |
| <b>2013</b>      | 284 | 44898 | 495 | 1769(194) | 881(138)  | 46(16)   | 398(62)  | 443(95)  | 1231(181) |
| <b>2014</b>      | 221 | 40611 | 412 | 1545(204) | 787(152)  | 61(27)   | 369(57)  | 328(64)  | 1106(178) |
| <b>2015</b>      | 204 | 51661 | 692 | 1347(215) | 712(167)  | 87(38)   | 257(39)  | 291(65)  | 940(186)  |
| <b>2016</b>      | 200 | 47369 | 802 | 1789(333) | 1011(309) | 46(14)   | 385(74)  | 347(70)  | 1041(130) |
| <b>2017</b>      | 138 | 44958 | 755 | 1603(114) | 824(62)   | 101(8)   | 303(31)  | 375(78)  | 1058(77)  |

\*Family OOP health care expenditures in a family with at least one person with diabetes.

†Individual OOP health care costs for that person with diabetes.

‡The premium cost was calculated as the premium paid by all members of the family. The small positive premium for the uninsured persons with diabetes was the premium paid by some family members who had private insurances. but this private insurance did not cover the person with diabetes.

**Supplemental Table 2.** Mean Annual Family Out-of-pocket (OOP) Expenditures by Income Level among People with Diabetes

|                           | Sample Size | Annual family income | Annual OOP family premium <sup>‡</sup> | All health care service | Annual family OOP cost <sup>*</sup> |                |                 |            | Individual OOP Cost of people with diabetes <sup>†</sup> |
|---------------------------|-------------|----------------------|----------------------------------------|-------------------------|-------------------------------------|----------------|-----------------|------------|----------------------------------------------------------|
|                           |             |                      |                                        |                         | Prescription drugs                  | Inpatient care | Outpatient care | Other care |                                                          |
|                           | n           | Mean, \$             | Mean, \$                               |                         | Mean (SD), \$                       |                |                 |            |                                                          |
| <b>Near Poor and Poor</b> |             |                      |                                        |                         |                                     |                |                 |            |                                                          |
| <b>2001</b>               | 207         | 12720                | 393                                    | 2406(226)               | 1627(156)                           | 191(84)        | 262(28)         | 325(87)    | 2031(208)                                                |
| <b>2002</b>               | 298         | 14409                | 379                                    | 2306(165)               | 1554(125)                           | 45(22)         | 291(67)         | 416(97)    | 1795(152)                                                |
| <b>2003</b>               | 281         | 13483                | 425                                    | 2444(181)               | 1997(165)                           | 55(22)         | 194(23)         | 198(15)    | 1803(162)                                                |
| <b>2004</b>               | 338         | 12630                | 389                                    | 2269(257)               | 1629(187)                           | 207(151)       | 191(33)         | 242(47)    | 1802(239)                                                |
| <b>2005</b>               | 349         | 14044                | 463                                    | 1897(133)               | 1386(95)                            | 55(26)         | 250(49)         | 206(43)    | 1406(104)                                                |
| <b>2006</b>               | 384         | 13380                | 240                                    | 2333(235)               | 1490(93)                            | 247(114)       | 277(42)         | 319(97)    | 1754(187)                                                |
| <b>2007</b>               | 307         | 13776                | 347                                    | 1663(151)               | 1065(95)                            | 35(11)         | 199(32)         | 364(95)    | 1159(96)                                                 |
| <b>2008</b>               | 360         | 12948                | 612                                    | 1670(135)               | 926(103)                            | 149(46)        | 288(35)         | 306(54)    | 1176(114)                                                |
| <b>2009</b>               | 396         | 11637                | 398                                    | 1486(288)               | 850(256)                            | 84(30)         | 310(73)         | 242(49)    | 1256(285)                                                |
| <b>2010</b>               | 389         | 13258                | 497                                    | 1208(131)               | 687(70)                             | 122(72)        | 199(38)         | 200(39)    | 929(104)                                                 |
| <b>2011</b>               | 455         | 11773                | 415                                    | 1283(131)               | 842(112)                            | 106(32)        | 200(27)         | 135(23)    | 1012(102)                                                |
| <b>2012</b>               | 488         | 13304                | 410                                    | 1045(136)               | 568(90)                             | 48(13)         | 189(62)         | 239(42)    | 831(119)                                                 |
| <b>2013</b>               | 500         | 13348                | 178                                    | 923(116)                | 496(85)                             | 83(33)         | 168(33)         | 176(29)    | 693(101)                                                 |
| <b>2014</b>               | 476         | 13009                | 257                                    | 844(111)                | 404(67)                             | 47(31)         | 214(45)         | 179(42)    | 623(98)                                                  |
| <b>2015</b>               | 458         | 12662                | 196                                    | 687(79)                 | 350(48)                             | 43(29)         | 147(31)         | 148(36)    | 539(73)                                                  |
| <b>2016</b>               | 477         | 12661                | 433                                    | 968(125)                | 470(104)                            | 28(9)          | 252(47)         | 218(44)    | 776(121)                                                 |
| <b>2017</b>               | 435         | 11963                | 277                                    | 1003(155)               | 541(127)                            | 49(27)         | 235(20)         | 178(25)    | 681(88)                                                  |
| <b>Low income</b>         |             |                      |                                        |                         |                                     |                |                 |            |                                                          |
| <b>2001</b>               | 149         | 31082                | 947                                    | 3289(526)               | 2251(393)                           | 121(54)        | 416(87)         | 501(133)   | 2118(280)                                                |
| <b>2002</b>               | 198         | 33539                | 1089                                   | 3271(444)               | 2222(342)                           | 195(94)        | 419(51)         | 436(89)    | 2216(297)                                                |
| <b>2003</b>               | 190         | 33760                | 1049                                   | 3088(366)               | 2323(347)                           | 57(21)         | 385(83)         | 324(101)   | 2149(256)                                                |
| <b>2004</b>               | 182         | 32783                | 1423                                   | 2816(377)               | 2071(337)                           | 55(26)         | 329(46)         | 362(60)    | 1757(161)                                                |
| <b>2005</b>               | 195         | 32689                | 970                                    | 1960(168)               | 1456(138)                           | 32(13)         | 271(54)         | 202(52)    | 1441(133)                                                |
| <b>2006</b>               | 222         | 33094                | 1377                                   | 2905(337)               | 1928(269)                           | 79(30)         | 522(107)        | 376(59)    | 1906(202)                                                |
| <b>2007</b>               | 203         | 34057                | 1298                                   | 2407(202)               | 1358(126)                           | 173(71)        | 406(57)         | 469(101)   | 1501(158)                                                |
| <b>2008</b>               | 250         | 32927                | 1369                                   | 2336(279)               | 1223(143)                           | 98(79)         | 541(111)        | 473(141)   | 1587(238)                                                |
| <b>2009</b>               | 241         | 30815                | 996                                    | 1682(190)               | 773(90)                             | 69(33)         | 427(118)        | 413(93)    | 1146(146)                                                |
| <b>2010</b>               | 207         | 32405                | 1570                                   | 1731(237)               | 994(184)                            | 102(63)        | 280(40)         | 355(90)    | 1173(193)                                                |
| <b>2011</b>               | 254         | 34432                | 1398                                   | 1669(158)               | 904(112)                            | 76(41)         | 373(48)         | 316(60)    | 1061(98)                                                 |
| <b>2012</b>               | 265         | 32309                | 1317                                   | 2072(243)               | 1004(113)                           | 132(58)        | 357(62)         | 579(205)   | 1290(202)                                                |
| <b>2013</b>               | 248         | 31846                | 1390                                   | 2012(376)               | 1115(226)                           | 31(14)         | 578(165)        | 289(51)    | 1218(247)                                                |
| <b>2014</b>               | 294         | 32124                | 950                                    | 1288(155)               | 594(89)                             | 126(61)        | 353(70)         | 216(47)    | 833(122)                                                 |
| <b>2015</b>               | 276         | 30818                | 1075                                   | 1460(196)               | 745(141)                            | 93(64)         | 322(75)         | 300(50)    | 1056(160)                                                |
| <b>2016</b>               | 266         | 30106                | 1276                                   | 1317(178)               | 635(134)                            | 46(17)         | 324(58)         | 313(73)    | 947(127)                                                 |

|                      |     |        |      |           |           |          |          |          |           |
|----------------------|-----|--------|------|-----------|-----------|----------|----------|----------|-----------|
| <b>2017</b>          | 237 | 31068  | 1014 | 1524(162) | 695(108)  | 114(18)  | 366(53)  | 350(107) | 974(88)   |
| <b>Middle Income</b> |     |        |      |           |           |          |          |          |           |
| <b>2001</b>          | 312 | 59223  | 1746 | 2630(186) | 1558(148) | 125(29)  | 453(47)  | 494(67)  | 1586(133) |
| <b>2002</b>          | 342 | 59834  | 1752 | 2430(158) | 1341(99)  | 129(68)  | 523(67)  | 437(50)  | 1604(140) |
| <b>2003</b>          | 276 | 58259  | 1957 | 3008(202) | 1866(139) | 135(50)  | 520(69)  | 487(57)  | 1936(159) |
| <b>2004</b>          | 295 | 54996  | 1996 | 2637(150) | 1612(106) | 69(27)   | 511(57)  | 446(57)  | 1613(106) |
| <b>2005</b>          | 339 | 54822  | 1753 | 2692(146) | 1609(113) | 70(20)   | 495(48)  | 519(72)  | 1635(125) |
| <b>2006</b>          | 363 | 56138  | 2086 | 2826(229) | 1569(119) | 250(172) | 576(73)  | 431(50)  | 1725(117) |
| <b>2007</b>          | 359 | 56376  | 2320 | 2642(217) | 1365(94)  | 76(22)   | 607(98)  | 595(116) | 1621(148) |
| <b>2008</b>          | 442 | 55772  | 1719 | 2629(216) | 1319(116) | 90(25)   | 689(118) | 530(89)  | 1738(167) |
| <b>2009</b>          | 430 | 55151  | 2005 | 2092(163) | 863(66)   | 286(90)  | 482(54)  | 461(73)  | 1299(119) |
| <b>2010</b>          | 415 | 56268  | 2209 | 1869(112) | 993(72)   | 56(23)   | 455(46)  | 365(52)  | 1152(73)  |
| <b>2011</b>          | 413 | 56280  | 2155 | 2011(155) | 961(67)   | 156(109) | 450(49)  | 444(66)  | 1259(126) |
| <b>2012</b>          | 449 | 55549  | 2097 | 1933(130) | 851(58)   | 146(46)  | 424(40)  | 512(73)  | 1276(94)  |
| <b>2013</b>          | 454 | 58528  | 2341 | 2284(230) | 886(87)   | 232(156) | 521(62)  | 645(121) | 1514(212) |
| <b>2014</b>          | 415 | 57634  | 2169 | 1771(131) | 775(79)   | 96(29)   | 477(54)  | 424(59)  | 1208(102) |
| <b>2015</b>          | 448 | 56725  | 2508 | 1810(128) | 841(66)   | 66(20)   | 466(59)  | 437(56)  | 1144(90)  |
| <b>2016</b>          | 413 | 58195  | 2353 | 1986(244) | 940(189)  | 64(17)   | 388(53)  | 594(122) | 1062(178) |
| <b>2017</b>          | 393 | 59362  | 2334 | 2006(249) | 764(132)  | 152(68)  | 481(45)  | 609(171) | 1088(122) |
| <b>High Income</b>   |     |        |      |           |           |          |          |          |           |
| <b>2001</b>          | 291 | 120903 | 2048 | 2913(192) | 1418(113) | 91(31)   | 660(78)  | 494(67)  | 1627(126) |
| <b>2002</b>          | 327 | 128896 | 1997 | 2938(151) | 1410(99)  | 75(24)   | 759(79)  | 437(50)  | 1773(127) |
| <b>2003</b>          | 260 | 119269 | 2741 | 3090(198) | 1560(100) | 43(18)   | 638(74)  | 487(57)  | 1907(153) |
| <b>2004</b>          | 292 | 124520 | 2852 | 3046(190) | 1526(116) | 62(16)   | 549(51)  | 446(57)  | 1730(130) |
| <b>2005</b>          | 282 | 117842 | 2791 | 3102(229) | 1643(155) | 139(45)  | 672(75)  | 519(72)  | 1791(183) |
| <b>2006</b>          | 332 | 122210 | 2689 | 3411(195) | 1792(122) | 100(25)  | 731(84)  | 431(50)  | 2028(135) |
| <b>2007</b>          | 333 | 123293 | 2429 | 3287(259) | 1348(99)  | 121(52)  | 717(75)  | 595(116) | 1820(126) |
| <b>2008</b>          | 379 | 124662 | 2706 | 2733(223) | 1164(144) | 107(34)  | 745(100) | 530(89)  | 1602(159) |
| <b>2009</b>          | 362 | 123233 | 2863 | 2439(141) | 1064(65)  | 65(19)   | 615(48)  | 461(73)  | 1384(104) |
| <b>2010</b>          | 334 | 119458 | 3108 | 2314(126) | 1000(68)  | 117(26)  | 605(53)  | 365(52)  | 1492(97)  |
| <b>2011</b>          | 366 | 122723 | 3033 | 2444(173) | 1161(78)  | 77(22)   | 636(63)  | 444(66)  | 1615(145) |
| <b>2012</b>          | 349 | 127707 | 3480 | 2795(218) | 1386(165) | 172(46)  | 663(64)  | 512(73)  | 1543(164) |
| <b>2013</b>          | 355 | 123082 | 3670 | 2563(154) | 1007(95)  | 96(31)   | 754(68)  | 645(121) | 1583(119) |
| <b>2014</b>          | 304 | 121527 | 3342 | 2319(150) | 814(62)   | 128(42)  | 741(68)  | 424(59)  | 1271(100) |
| <b>2015</b>          | 337 | 124178 | 3189 | 2591(177) | 1000(99)  | 132(46)  | 736(82)  | 437(56)  | 1395(108) |
| <b>2016</b>          | 379 | 122833 | 4001 | 2271(151) | 892(92)   | 44(14)   | 771(70)  | 594(122) | 1364(109) |
| <b>2017</b>          | 379 | 130557 | 3753 | 2458(178) | 794(86)   | 106(28)  | 708(73)  | 609(171) | 1431(118) |

\* Family out of pocket expenditure in a family with at least one person with diabetes

† Individual OOP cost for that person with diabetes.

‡ The premium cost was calculated as the premium paid by all members of the family. The small positive premium for the uninsured persons with diabetes was the premium paid by some family members who had private insurances. but this private insurance did not cover the person with diabetes.
